# Supplementary material
Source: publisher figshare collection journal article supplement (https://springernature.figshare.com/ndownloader/files/14014013)
Supplement: Supplementary file [file 14014013]

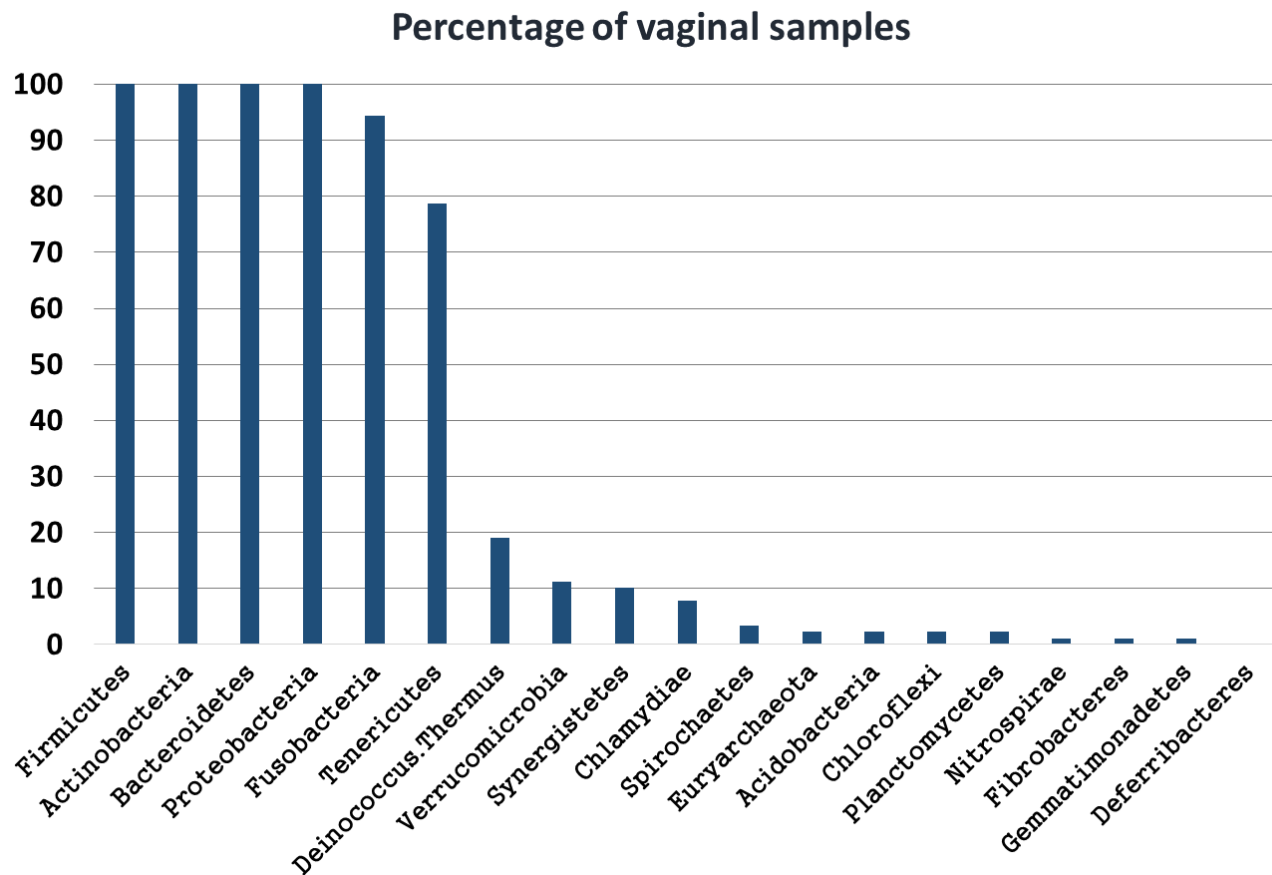

**Figure S1. Phylum-level microbiota of vaginal samples.** Four phyla, Firmicutes, Actinobacteria, Bacteroidetes, and Proteobacteria, were detectable in all vaginal samples; and two phyla, Fusobacteria and Tenericutes, were present in most of the vaginal samples.
